# Supplementary material for: Accumulation and transfer of polystyrene microplastics in Solanum nigrum seedlings
Source: PeerJ. 2023 Aug 31;11:e15967. doi: 10.7717/peerj.15967 (PMC10475273; doi:10.7717/peerj.15967)
Supplement: Supplemental Information 2 — Plant heights were 15.6 cm and 15.0 cm after treatment with 0 and 0.2 µm MPs, respectively. The presence of PS beads had no significant effect on plant height and root and shoot biomass of S. nigrum seedlings after exposure to PS beads for 30 d. [file peerj-11-15967-s002.xlsx]

## Sheet: Sheet1
			PS-size	shootbiomass	rootbiomass				PS-size	plant height
			0	0.3428	0.1164				0	14.7
			0	0.3306	0.116				0	16.8
			0	0.3559	0.1305				0	14.2
			0	0.363	0.1173				0	16.9
			0	0.3232	0.1192				0	15.5
			0	0.303	0.121				0	15.6
			0.2	0.3201	0.1096				0.2	15
			0.2	0.3396	0.1294				0.2	14.6
			0.2	0.3218	0.1031				0.2	13.4
			0.2	0.2885	0.1517				0.2	15.8
			0.2	0.3011	0.1198				0.2	14.7
			0.2	0.2833	0.127				0.2	16.2
